# Supplementary material for: Mixed Convection Stagnation Point Flow of the Blood Based Hybrid Nanofluid Around A Rotating Sphere
Source: Research Square preprint supplement (doi:10.21203/rs.3.rs-132540/v1), 2020-12-30
Supplement: Supplementary file 1 [file 5a5c29854744c162e9f481e1.docx]

**Table 1:** Thermo-physical traits of **/**blood nanofluid [11], [29].

| Viscosity |  |
| --- | --- |
| Density |  |
| Specific Heat |  |
| Thermal Conductivity |  |

**Table 2:** Thermo-physical traits of [11], [29].

| Viscosity |  |
| --- | --- |
| Density |  |
| Specific Heat |  |
| Thermal Conductivity |  |

**Table 3:** Various thermo-physical characters of blood, Silver and Titania [29].

| Thermo-physical Prop. | **Size (nm)** |  |  |  |
| --- | --- | --- | --- | --- |
| **Silver:** | 2-5 | 235 | 10500 | 429 |
| **Titania:**  **(Titanium dioxide)** | 50 | 686.2 | 4250 | 8.954 |
| **Pure Blood** | - | 3594 | 1063 | 0.492 |

**Table-4** Comparison between the present results and Ref [44] for the velocity gradient

at different values of for

|  |  |  |  |  |
| --- | --- | --- | --- | --- |
|  | Ref [24]  results | Ref [24]  results | Current  result | Current  result |
| 0.1 | 1.1299 | -0.634632 | 1.12994579 | -0.6346328456 |
| 0.3 | 1.17448 | -0.663496 | 1.174483467 | -0.6634967345 |
| 0.5 | 1.21899 | -0.692221 | 1.218992356 | -0.6922215234 |
| 0.7 | 1.26345 | -0.720806 | 1.263452314 | -0.7208063421 |

**Table 5.** Evaluation of the Skin friction coefficients for selected values of

|  |  |  |  |  |  |  |
| --- | --- | --- | --- | --- | --- | --- |
| 0.1 | 0.1 | 0.01 | 2.32541 | 2.12971 | 1.3469128 | 1.335724 |
| 0.3 |  |  | 2.3275 | 2.14382 | 1.3478239 | 1.336736 |
| 0.5 |  |  | 2.3711 | 2.16261 | 1.3488348 | 1.337748 |
| **0.1** | 0.2 |  | 2.87276 | 2.599421 | 1.3484724 | 1.339258 |
|  | 0.3 |  | 2.89991 | 2.63724 | 1.358523 | 1.341457 |
| **0.1** | 0.1 | 0.00 | 2.33763 | 2.116457 | 1.3458017 | 1.3423721 |
|  |  | 0.02 | 3.48962 | 3.274681 | 1.3512781 | 1.3512781 |
|  |  | 0.04 | 3.65905 | 3.385791 | 1.3573238 | 1.3573238 |

**Table 6.** Evaluation of the heat transfer rate for selected values of using the % formula

|  |  |  |  |  |
| --- | --- | --- | --- | --- |
| 1 | 0.1 | 0.01 | 0.05123 | 0.037077 |
| 1.5 | 0.1 |  | 0.05934 | 0.037823 |
| 2 | 0.1 |  | 0.06745 | 0.038039 |
| 2 | 0.2 |  | 0.06956 | 0.038564 |
| 2 | 0.3 |  | 0.07376 | 0.038917 |
| 2 | 0.4 |  | 0.07959 | 0.039021 |
| 2 | 0.4 |  | 0.09502 | 0.039346 |
|  |  | 0.0 | 0.0424654 | 0.0492 |
|  |  | 0.01 | 0.0449406  (5.8 % Increase) | 0.0504676  (2.576 % Increase) |
|  |  | 0.02 | 0.0475391  (11.947 % Increase) | 0.0517571  (5.197 % Increase) |

**Table.7:** Convergence of OHAM for

|  |  |  |
| --- | --- | --- |
| 5 |  |  |
| 10 |  |  |
| 15 |  |  |
| 20 |  |  |
| 25 |  |  |

**Table.8:** Convergence of OHAM for

|  |  |  |
| --- | --- | --- |
| 5 |  |  |
| 10 |  |  |
| 15 |  |  |
| 20 |  |  |
| 25 |  |  |
